# Supplementary material for: Ni-Based catalysts supported on natural clay of attapulgite applied in the dry reforming of methane reaction
Source: Royal Society of Chemistry journal article supplement (doi:10.1039/d0nj03069d), 2020-01-01
Supplement: d0nj03069d1.pdf [file d0nj03069d1.pdf]

Supporting information

## Ni-Based Catalysts Supported on Nature Clay of Attapulgite Applied in the Dry Reforming of Methane Reaction

Hui Dai <sup>a&b</sup>\*, Peixin Yu <sup>a</sup>, Hongsheng Liu <sup>a</sup>, Siqi Xiong <sup>a</sup>, Xin Xiao <sup>b</sup>, Jie Deng <sup>c</sup>, Lihong Huang <sup>a</sup>

<sup>a</sup>College of Materials and Chemistry & Chemical Engineering, Chengdu University of Technology, Chengdu, 610059, China

<sup>b</sup>Department of Chemical Engineering, Sichuan University, Chengdu, 610065, China

<sup>c</sup>College of Pharmacy and Bioengineering, Chengdu University, Chengdu, 610106, China

\*Corresponding emails: daihui18@cdut.edu.cn(H. Dai)

### Table of content:

**Fig. S1.** The pore size distribution curves were calculated from the BJH method.

**Fig. S2.** The HRTEM images for Ni/ATP (a), Ni/ATP@Ce (b), Ni/ATP@Mg (c) and Ni/ATP@Mn (d) catalysts.

**Fig. S3.** The XPS wide-scan spectrum from top to the bottom were Ni/ATP, Ni-ATP@Ce, Ni-ATP@Mg and Ni-ATP@Mn catalysts.

**Fig. S4.** Ni 2p<sub>3/2</sub> photoelectron spectrum of reduced Ni/ATP, Ni-ATP@Ce, Ni-ATP@Mg and Ni-ATP@Mn catalysts.

**Fig. S5.** O 1s photoelectron spectrum of reduced Ni/ATP, Ni-ATP@Ce, Ni-ATP@Mg and Ni-ATP@Mn catalysts.

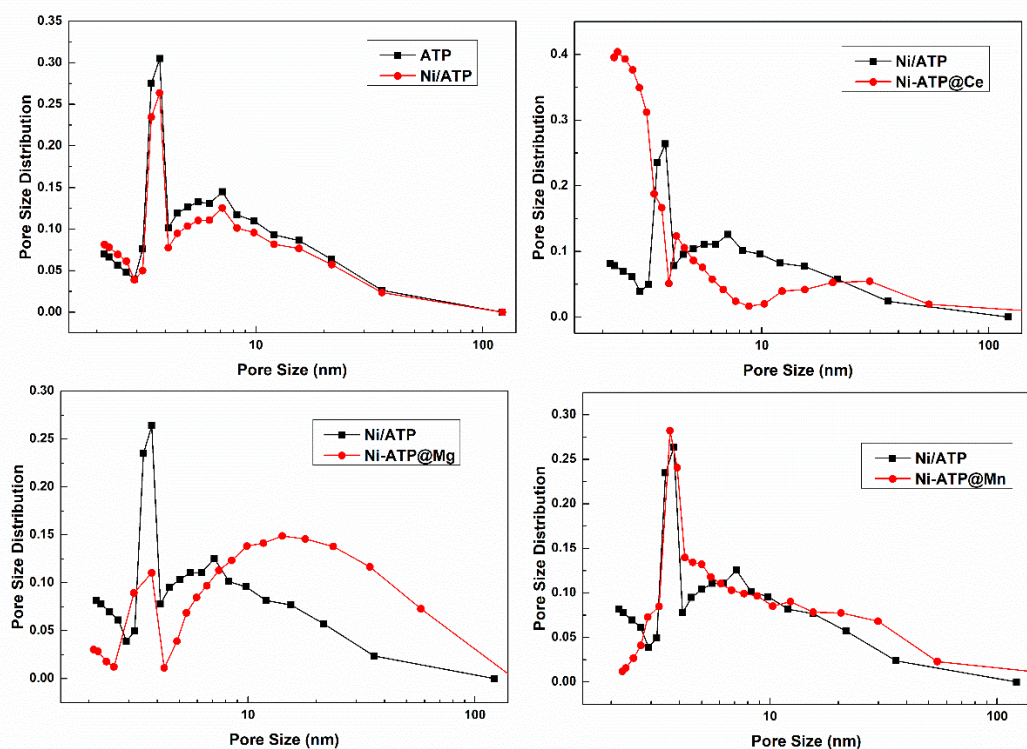

**Fig. S1.** The pore size distribution curves were calculated from the BJH method

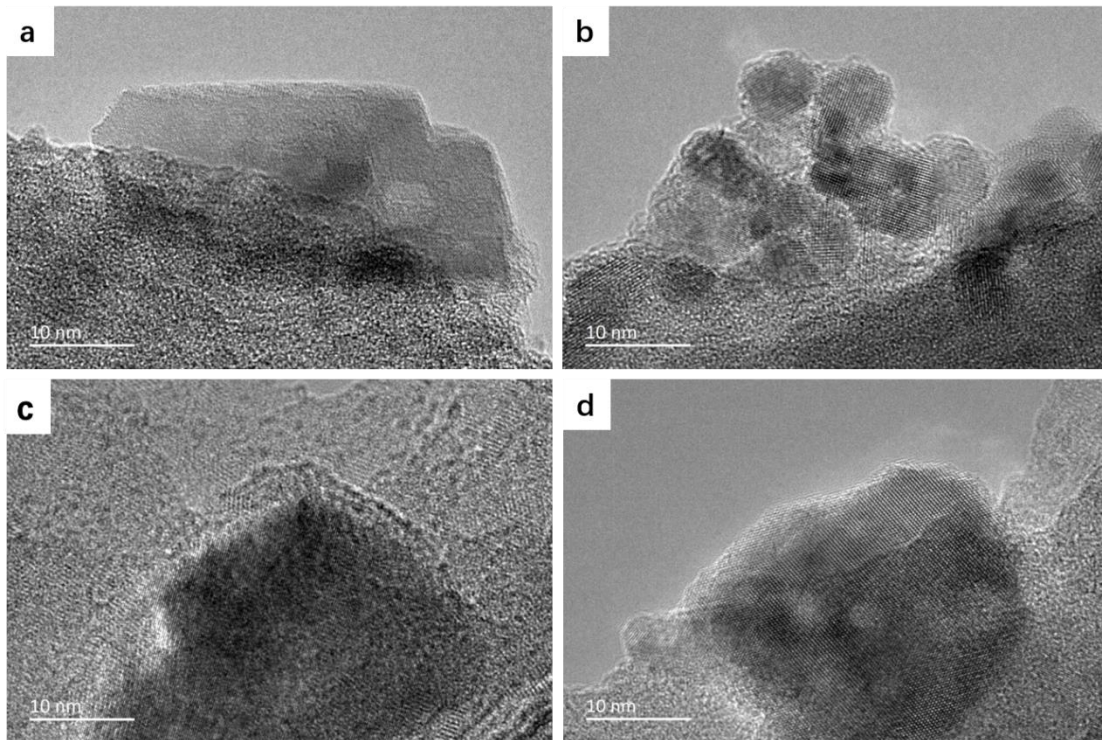

**Fig. S2.** The HRTEM images for Ni/ATP (a), Ni/ATP@Ce (b), Ni/ATP@Mg (c) and Ni/ATP@Mn (d) catalysts.

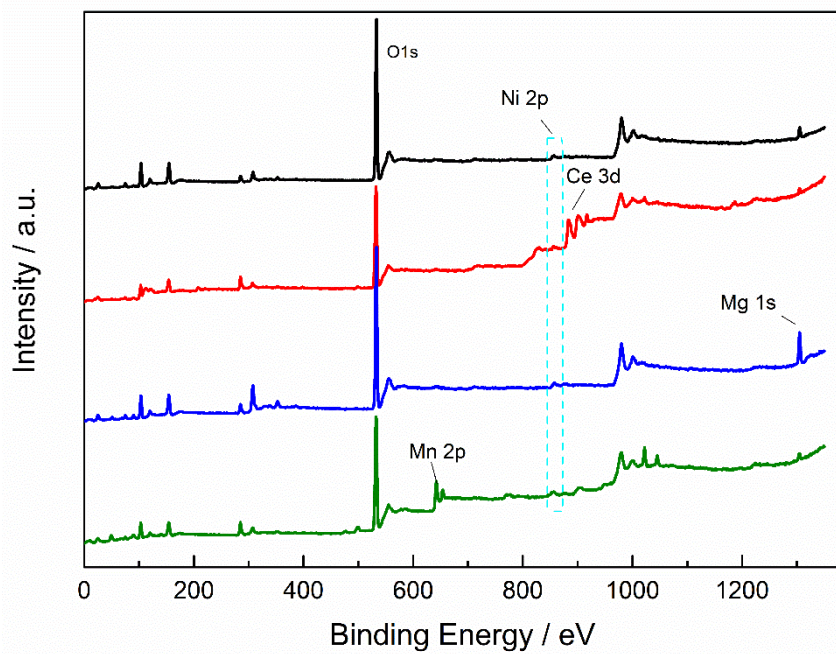

**Fig. S3.** The XPS wide-scan spectrum from top to the bottom were Ni/ATP, Ni-ATP@Ce, Ni-ATP@Mg and Ni-ATP@Mn catalysts.

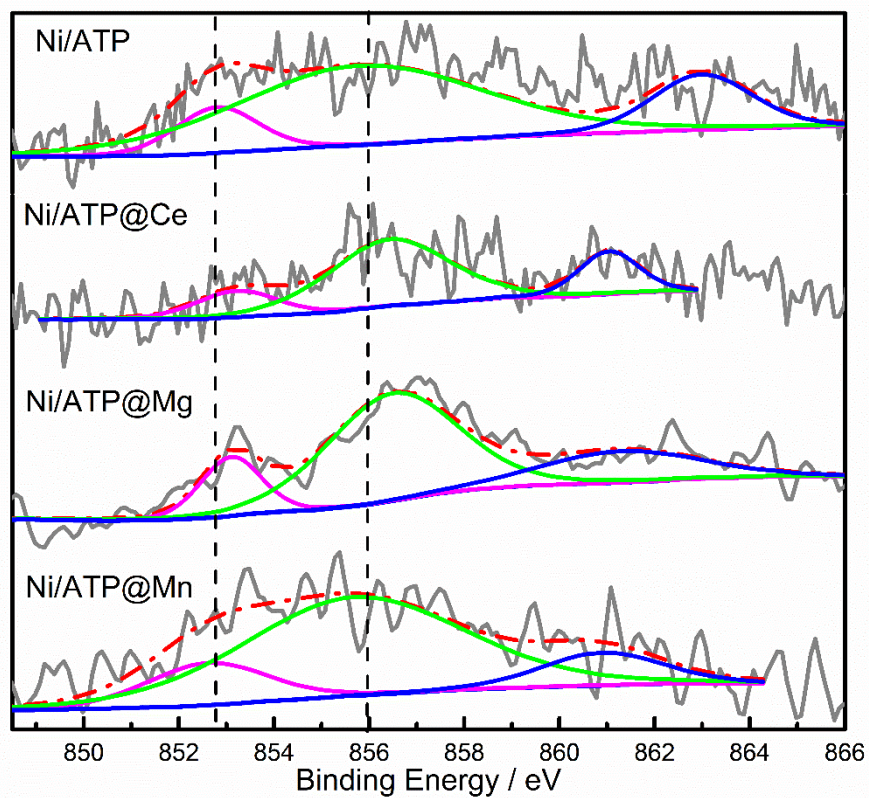

**Fig. S4.** Ni 2p<sub>3/2</sub> photoelectron spectrum of Ni/ATP, Ni-ATP@Ce, Ni-ATP@Mg and Ni-ATP@Mn catalysts.

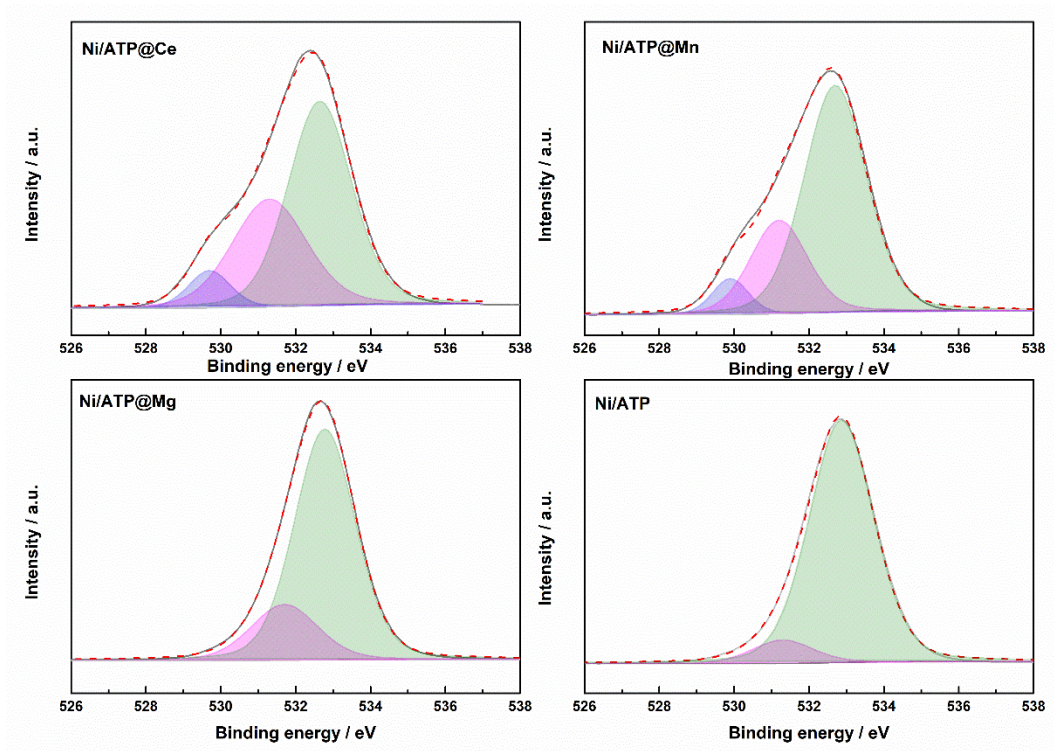

**Fig. S5.** O 1s photoelectron spectrum of Ni/ATP, Ni-ATP@Ce, Ni-ATP@Mg and Ni-ATP@Mn catalysts.
